# Supplementary material for: An Excess of Gene Expression Divergence on the X Chromosome in Drosophila Embryos: Implications for the Faster-X Hypothesis
Source: PubMed Central journal article supplement (PMC3531489; doi:10.1371/journal.pgen.1003200), 2012-12-27

mel

per

pse

sim

vir

ana

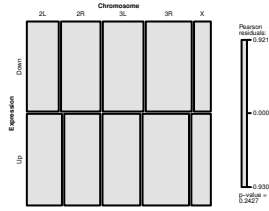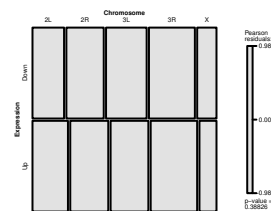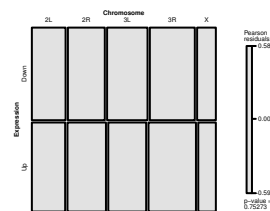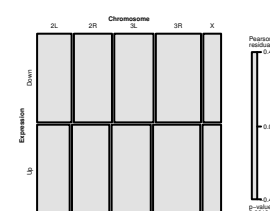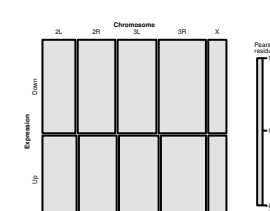

mel

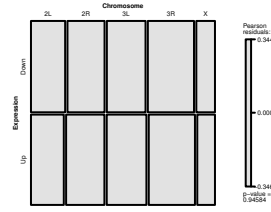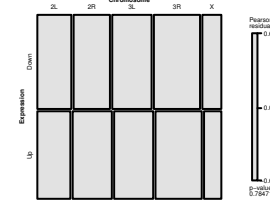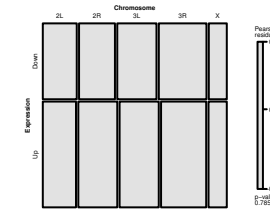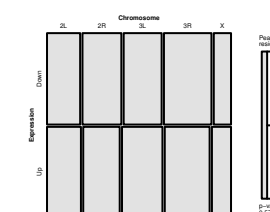

per

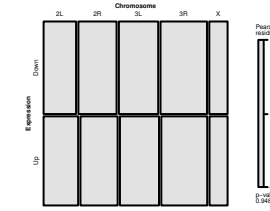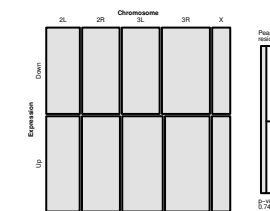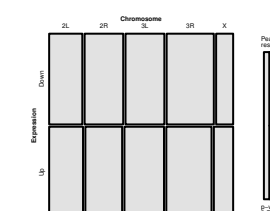

pse

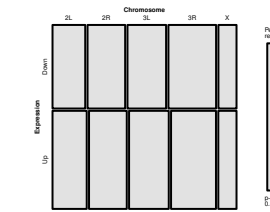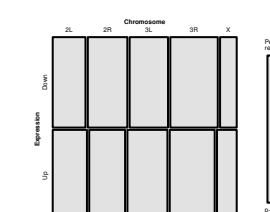

sim

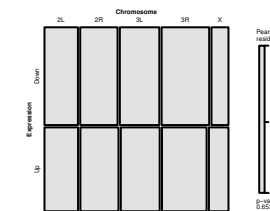

Supplement: pgen.1003200.s004.pdf [file pgen.1003200.s004.pdf]
