# Supplementary material for: An Excess of Gene Expression Divergence on the X Chromosome in Drosophila Embryos: Implications for the Faster-X Hypothesis
Source: PubMed Central journal article supplement (PMC3531489; doi:10.1371/journal.pgen.1003200), 2012-12-27

Bootstrapped Correlation of Gene Expression

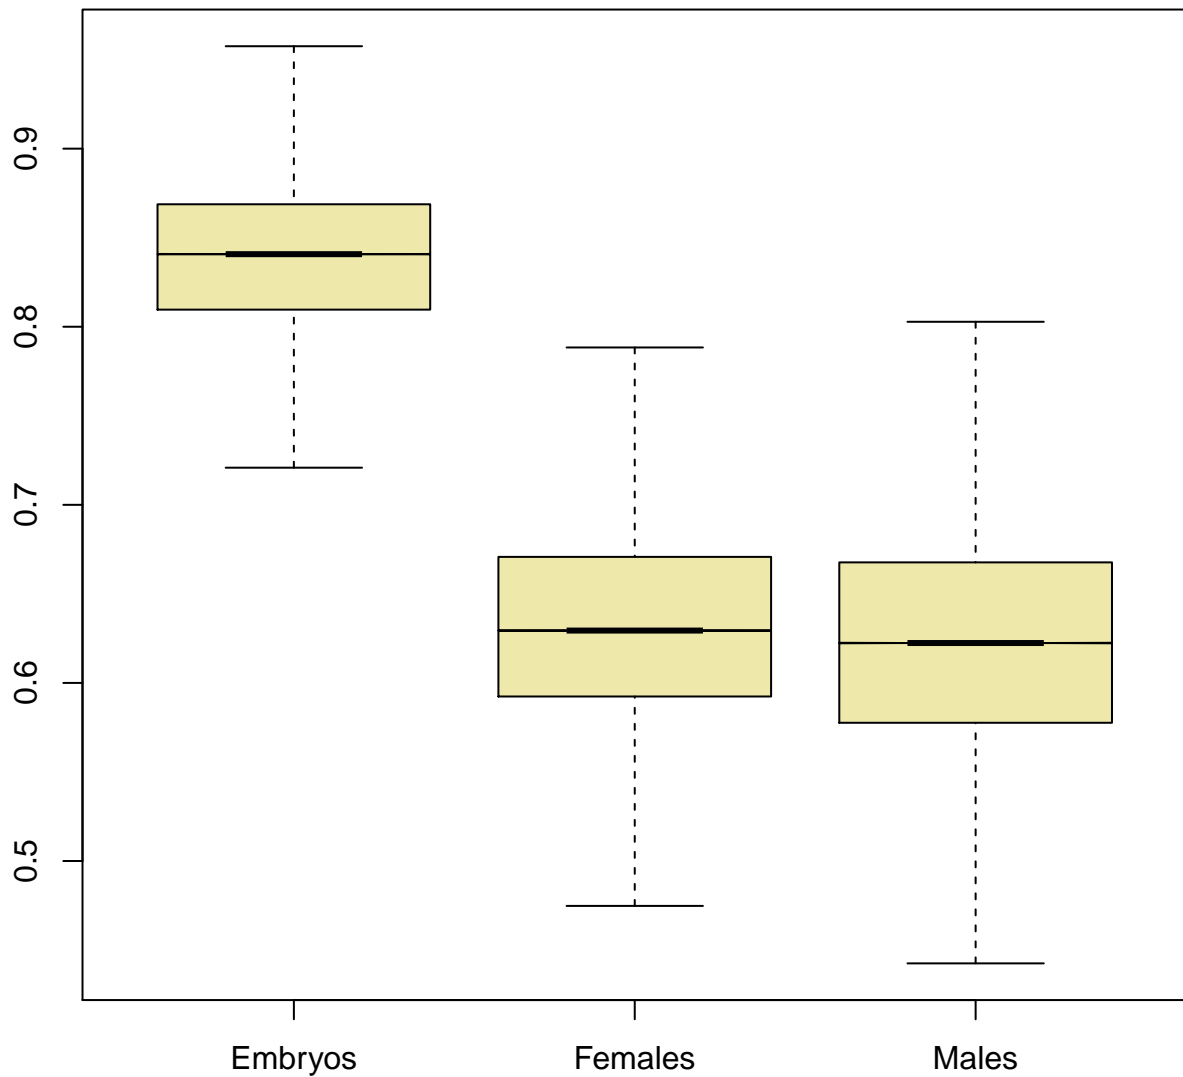

Supplement: pgen.1003200.s011.pdf [file pgen.1003200.s011.pdf]
