# Supplementary material for: An Excess of Gene Expression Divergence on the X Chromosome in Drosophila Embryos: Implications for the Faster-X Hypothesis
Source: PubMed Central journal article supplement (PMC3531489; doi:10.1371/journal.pgen.1003200), 2012-12-27

$$\rho_{\text{TOTAL}} = -0.42$$

$$\rho_{\text{A}} = 0.50$$

$$\rho_{\text{B}} = 0.66$$

$$\rho_{\text{A:B}} = -0.96$$

$$\rho_{\text{B:A}} = -0.95$$

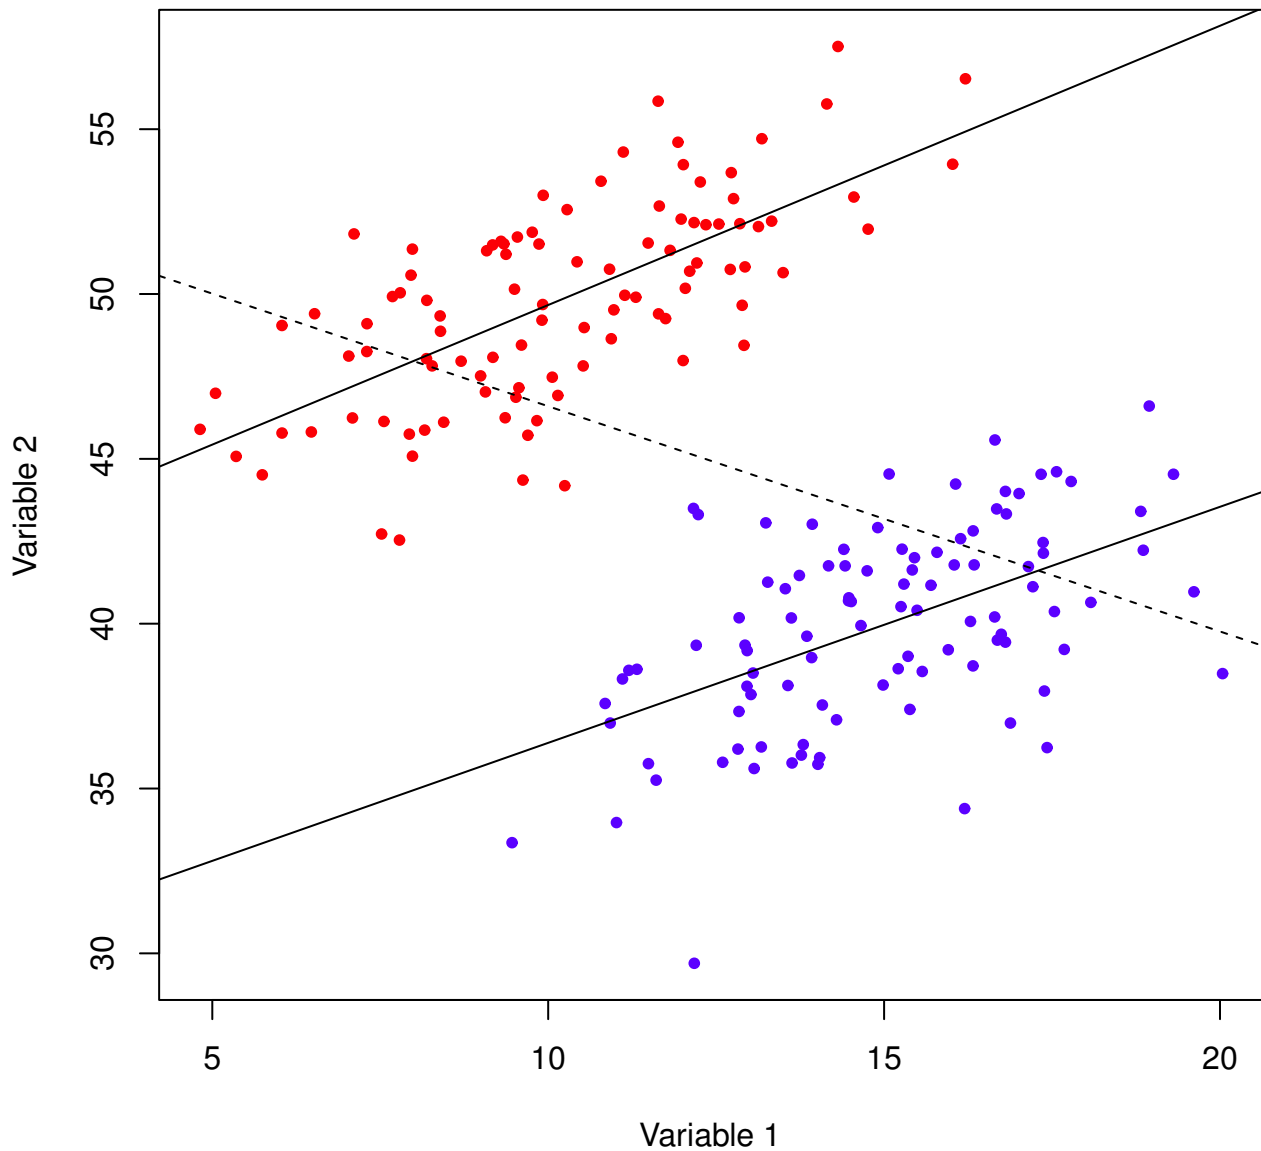

Supplement: pgen.1003200.s025.pdf [file pgen.1003200.s025.pdf]
