# Supplementary material for: An Excess of Gene Expression Divergence on the X Chromosome in Drosophila Embryos: Implications for the Faster-X Hypothesis
Source: PubMed Central journal article supplement (PMC3531489; doi:10.1371/journal.pgen.1003200), 2012-12-27
Supplement: pgen.1003200.s027.pdf [file pgen.1003200.s027.pdf]

Supplementary Table 1: **The chromosomal distribution of genes in the expression datasets**

| Stage   | Comparison | 2L   | 2R   | 3L   | 3R   | X    | Total |
|---------|------------|------|------|------|------|------|-------|
| Embryos | species    | 579  | 651  | 677  | 798  | 314  | 3019  |
| Embryos | strains    | 2267 | 2521 | 2437 | 3005 | 1998 | 12228 |
| Adults  | species    | 1214 | 1360 | 1215 | 1662 | 881  | 6332  |
| Adults  | strains    | 1694 | 1843 | 1721 | 2217 | 1275 | 8750  |
