# Supplementary material for: An Excess of Gene Expression Divergence on the X Chromosome in Drosophila Embryos: Implications for the Faster-X Hypothesis
Source: PubMed Central journal article supplement (PMC3531489; doi:10.1371/journal.pgen.1003200), 2012-12-27
Supplement: pgen.1003200.s029.pdf [file pgen.1003200.s029.pdf]

Supplementary Table 3: **Contrasts for *D. melanogaster* embryo strain comparisons**

| Contrast | Mean 1st | Mean 2nd | W-stat   | <i>P</i> -value         | <i>P</i> <sub>adj</sub> -value |
|----------|----------|----------|----------|-------------------------|--------------------------------|
| Aut-X    | 1.400482 | 1.287024 | 11273798 | 1.16 x 10 <sup>-9</sup> | -                              |
| 2L-X     | 1.411071 | 1.287024 | 2496381  | 7.8 x 10 <sup>-9</sup>  | 7.8 x 10 <sup>-8</sup>         |
| 2R-X     | 1.395688 | 1.287024 | 2731109  | 1.1 x 10 <sup>-6</sup>  | 3.5 x 10 <sup>-6</sup>         |
| 3L-X     | 1.422667 | 1.287024 | 2667918  | 3.8 x 10 <sup>-9</sup>  | 1.9 x 10 <sup>-7</sup>         |
| 3R-X     | 1.380755 | 1.287024 | 3205879  | 4.6 x 10 <sup>-5</sup>  | 1.2 x 10 <sup>-4</sup>         |
| 2L-2R    | 1.411071 | 1.395688 | 2905198  | 0.318                   | 0.424                          |
| 2L-3L    | 1.411071 | 1.422667 | 2771018  | 0.852                   | 0.852                          |
| 2L-3R    | 1.411071 | 1.380755 | 3514421  | 0.048                   | 0.096                          |
| 2R-3L    | 1.395688 | 1.422667 | 3032346  | 0.433                   | 0.481                          |
| 2R-3R    | 1.395688 | 1.380755 | 3844265  | 0.339                   | 0.424                          |
| 3L-3R    | 1.422667 | 1.380755 | 3764470  | 0.074                   | 0.123                          |

Aut - all autosomes. W - Wilcoxon rank sum test statistic. P-values adjusted according to Benjamini-Hochberg correction.
