# Supplementary material for: An Excess of Gene Expression Divergence on the X Chromosome in Drosophila Embryos: Implications for the Faster-X Hypothesis
Source: PubMed Central journal article supplement (PMC3531489; doi:10.1371/journal.pgen.1003200), 2012-12-27
Supplement: pgen.1003200.s030.pdf [file pgen.1003200.s030.pdf]

Supplementary Table 4: **Contrasts for *Drosophila* adult female species comparisons**

| Contrast | Mean 1st | Mean 2nd | W-stat   | <i>P</i> -value | <i>P</i> <sub>adj</sub> -value |
|----------|----------|----------|----------|-----------------|--------------------------------|
| Aut-X    | 1.128154 | 1.129415 | 2409026  | 0.994           | -                              |
| 2L-X     | 1.118199 | 1.129415 | 528305.5 | 0.636           | -                              |
| 2R-X     | 1.127064 | 1.129415 | 599021   | 0.997           | -                              |
| 3L-X     | 1.141319 | 1.129415 | 543405.5 | 0.549           | -                              |
| 3R-X     | 1.126056 | 1.129415 | 729981   | 0.904           | -                              |
| 2L-2R    | 1.118199 | 1.127064 | 815877.5 | 0.609           | -                              |
| 2L-3L    | 1.118199 | 1.141319 | 717046   | 0.237           | -                              |
| 2L-3R    | 1.118199 | 1.126056 | 999595.5 | 0.675           | -                              |
| 2R-3L    | 1.127064 | 1.141319 | 812860.5 | 0.479           | -                              |
| 2R-3R    | 1.127064 | 1.126056 | 1133633  | 0.884           | -                              |
| 3L-3R    | 1.141319 | 1.126056 | 1028575  | 0.390           | -                              |

Aut - all autosomes. W - Wilcoxon rank sum test statistic. P-values adjusted according to Benjamini-Hochberg correction.
