# Supplementary material for: An Excess of Gene Expression Divergence on the X Chromosome in Drosophila Embryos: Implications for the Faster-X Hypothesis
Source: PubMed Central journal article supplement (PMC3531489; doi:10.1371/journal.pgen.1003200), 2012-12-27
Supplement: pgen.1003200.s031.pdf [file pgen.1003200.s031.pdf]

Supplementary Table 5: **Contrasts for *Drosophila* adult male species comparisons**

| Contrast | Mean 1st | Mean 2nd | W-stat   | <i>P</i> -value | <i>P</i> <sub>adj</sub> -value |
|----------|----------|----------|----------|-----------------|--------------------------------|
| Aut-X    | 1.168791 | 1.184388 | 2361976  | 0.3552          | -                              |
| 2L-X     | 1.170921 | 1.184388 | 525043.5 | 0.477           | -                              |
| 2R-X     | 1.159897 | 1.184388 | 584673   | 0.336           | -                              |
| 3L-X     | 1.172074 | 1.184388 | 525263   | 0.467           | -                              |
| 3R-X     | 1.169593 | 1.184388 | 717711.5 | 0.413           | -                              |
| 2L-2R    | 1.170921 | 1.159897 | 830314   | 0.800           | -                              |
| 2L-3L    | 1.170921 | 1.172074 | 738058   | 0.975           | -                              |
| 2L-3R    | 1.170921 | 1.169593 | 1011397  | 0.907           | -                              |
| 2R-3L    | 1.159897 | 1.172074 | 822211.5 | 0.832           | -                              |
| 2R-3R    | 1.159897 | 1.169593 | 1125957  | 0.860           | -                              |
| 3L-3R    | 1.1195   | 1.169593 | 1011382  | 0.938           | -                              |

Aut - all autosomes. W - Wilcoxon rank sum test statistic. P-values adjusted according to Benjamini-Hochberg correction.
