# Supplementary material for: An Excess of Gene Expression Divergence on the X Chromosome in Drosophila Embryos: Implications for the Faster-X Hypothesis
Source: PubMed Central journal article supplement (PMC3531489; doi:10.1371/journal.pgen.1003200), 2012-12-27
Supplement: pgen.1003200.s032.pdf [file pgen.1003200.s032.pdf]

Supplementary Table 6: **Contrasts for *D. melanogaster* female adult strain comparisons**

| Contrast | Mean 1st  | Mean 2nd  | W-stat  | <i>P</i> -value       | <i>P<sub>adj</sub></i> -value |
|----------|-----------|-----------|---------|-----------------------|-------------------------------|
| Aut-X    | 0.6113846 | 0.5431882 | 5192587 | $7.28 \times 10^{-6}$ | -                             |
| 2L-X     | 0.6399925 | 0.5431882 | 1219771 | $1.46 \times 10^{-9}$ | $1.68 \times 10^{-8}$         |
| 2R-X     | 0.6033502 | 0.5431882 | 1244176 | 0.0051                | 0.0078                        |
| 3L-X     | 0.6187143 | 0.5431882 | 1189794 | $3.78 \times 10^{-5}$ | 0.00020                       |
| 3R-X     | 0.5943979 | 0.5431882 | 1494048 | 0.0025                | 0.0046                        |
| 2L-2R    | 0.6399925 | 0.6033502 | 1663789 | $7.1 \times 10^{-4}$  | 0.0046                        |
| 2L-3L    | 0.6399925 | 0.6187143 | 1520440 | 0.029                 | 0.040                         |
| 2L-3R    | 0.6399925 | 0.5943979 | 2010076 | $1.6 \times 10^{-4}$  | 0.0019                        |
| 2R-3L    | 0.6033502 | 0.6187143 | 1548129 | 0.219                 | 0.240                         |
| 2R-3R    | 0.6033502 | 0.5943979 | 2049155 | 0.868                 | 0.868                         |
| 3L-3R    | 0.6187143 | 0.5943979 | 1959594 | 0.143                 | 0.175                         |

Aut - all autosomes. W - Wilcoxon rank sum test statistic. P-values adjusted according to Benjamini-Hochberg correction.
