# Supplementary material for: An Excess of Gene Expression Divergence on the X Chromosome in Drosophila Embryos: Implications for the Faster-X Hypothesis
Source: PubMed Central journal article supplement (PMC3531489; doi:10.1371/journal.pgen.1003200), 2012-12-27
Supplement: pgen.1003200.s033.pdf [file pgen.1003200.s033.pdf]

Supplementary Table 7: **Contrasts for *D. melanogaster* male adult strain comparisons**

| Contrast | Mean 1st  | Mean 2nd  | W-stat  | <i>P</i> -value          | <i>P</i> <sub>adj</sub> -value |
|----------|-----------|-----------|---------|--------------------------|--------------------------------|
| Aut-X    | 0.4768255 | 0.4189356 | 5359535 | 9.89 x 10 <sup>-11</sup> | -                              |
| 2L-X     | 0.4877695 | 0.4189356 | 1249111 | 2.52 x 10 <sup>-13</sup> | 2.56 x 10 <sup>-12</sup>       |
| 2R-X     | 0.4705672 | 0.4189356 | 1281926 | 1.49 x 10 <sup>-5</sup>  | 4.97 x 10 <sup>-5</sup>        |
| 3L-X     | 0.4884414 | 0.4189356 | 1255394 | 1.38 x 10 <sup>-11</sup> | 6.89 x 10 <sup>-11</sup>       |
| 3R-X     | 0.467385  | 0.4189356 | 1526993 | 7.42 x 10 <sup>-5</sup>  | 1.86 x 10 <sup>-4</sup>        |
| 2L-2R    | 0.4877695 | 0.4705672 | 1657322 | 0.0015                   | 0.0021                         |
| 2L-3L    | 0.4877695 | 0.4884414 | 1473490 | 0.583                    | 0.583                          |
| 2L-3R    | 0.4877695 | 0.467385  | 2013942 | 9.99 x 10 <sup>-5</sup>  | 2.00 x 10 <sup>-4</sup>        |
| 2R-3L    | 0.4705672 | 0.4884414 | 1505481 | 0.0088                   | 0.011                          |
| 2R-3R    | 0.4705672 | 0.467385  | 2064474 | 0.563                    | 0.583                          |
| 3L-3R    | 0.4884414 | 0.467385  | 2025011 | 9.20 x 10 <sup>-4</sup>  | 0.0015                         |

Aut - all autosomes. W - Wilcoxon rank sum test statistic. P-values adjusted according to Benjamini-Hochberg correction.
