# Supplementary material for: An Excess of Gene Expression Divergence on the X Chromosome in Drosophila Embryos: Implications for the Faster-X Hypothesis
Source: PubMed Central journal article supplement (PMC3531489; doi:10.1371/journal.pgen.1003200), 2012-12-27
Supplement: pgen.1003200.s034.pdf [file pgen.1003200.s034.pdf]

Supplementary Table 8: **Contrasts for *Drosophila* embryos for a common set of 2072 genes and 5 species.**

| Contrast | Mean 1st | Mean 2nd | W-stat   | <i>P</i> -value        | <i>P<sub>adj</sub></i> -value |
|----------|----------|----------|----------|------------------------|-------------------------------|
| 2L-X     | 1.767753 | 2.023779 | 39029    | 0.009315               | 0.0232                        |
| 2R-X     | 1.647628 | 2.023779 | 39580    | 5.4 x 10 <sup>-5</sup> | 5.4 x 10 <sup>-4</sup>        |
| 3L-X     | 1.759429 | 2.023779 | 40418    | 0.004624               | 0.0154                        |
| 3R-X     | 1.736327 | 2.023779 | 51914.5  | 8.5 x 10 <sup>-4</sup> | 0.0042                        |
| 2L-2R    | 1.767753 | 1.647628 | 99783    | 0.02553                | 0.051                         |
| 2L-3L    | 1.767753 | 1.759429 | 89248    | 0.3774                 | 0.377                         |
| 2L-3R    | 1.767753 | 1.736327 | 119319   | 0.2105                 | 0.263                         |
| 2R-3L    | 1.647628 | 1.759429 | 91380    | 0.06257                | 0.104                         |
| 2R-3R    | 1.647628 | 1.736327 | 121461.5 | 0.09044                | 0.129                         |
| 3L-3R    | 1.759429 | 1.736327 | 123275   | 0.3443                 | 0.377                         |

W - Wilcoxon rank sum test statistic. P-values adjusted according to Benjamini-Hochberg correction.
