# Supplementary material for: An Excess of Gene Expression Divergence on the X Chromosome in Drosophila Embryos: Implications for the Faster-X Hypothesis
Source: PubMed Central journal article supplement (PMC3531489; doi:10.1371/journal.pgen.1003200), 2012-12-27
Supplement: pgen.1003200.s035.pdf [file pgen.1003200.s035.pdf]

Supplementary Table 9: **Contrasts for *Drosophila* adults for a common set of 2072 genes and 5 species.**

| Contrast | Mean 1st  | Mean 2nd  | W-stat  | <i>P</i> -value | <i>P<sub>adj</sub></i> -value |
|----------|-----------|-----------|---------|-----------------|-------------------------------|
| 2L-X     | 0.9187558 | 0.9741846 | 40504.5 | 0.04798         | 0.164                         |
| 2R-X     | 0.90749   | 0.9741846 | 44751.5 | 0.04946         | 0.164                         |
| 3L-X     | 0.9049189 | 0.9741846 | 41350   | 0.01444         | 0.144                         |
| 3R-X     | 0.9461049 | 0.9741846 | 57753.5 | 0.1443          | 0.288                         |
| 2L-2R    | 0.9187558 | 0.90749   | 92572   | 0.4904          | 0.490                         |
| 2L-3L    | 0.9187558 | 0.9049189 | 90367.5 | 0.2641          | 0.293                         |
| 2L-3R    | 0.9187558 | 0.9461049 | 112693  | 0.2353          | 0.293                         |
| 2R-3L    | 0.90749   | 0.9049189 | 99597   | 0.2614          | 0.293                         |
| 2R-3R    | 0.90749   | 0.9461049 | 124054  | 0.2174          | 0.293                         |
| 3L-3R    | 0.9049189 | 0.9461049 | 115402  | 0.08814         | 0.220                         |

W - Wilcoxon rank sum test statistic. P-values adjusted according to Benjamini-Hochberg correction.
