# Supplementary material for: An Excess of Gene Expression Divergence on the X Chromosome in Drosophila Embryos: Implications for the Faster-X Hypothesis
Source: PubMed Central journal article supplement (PMC3531489; doi:10.1371/journal.pgen.1003200), 2012-12-27
Supplement: pgen.1003200.s036.pdf [file pgen.1003200.s036.pdf]

Supplementary Table 10: **Characterisation of genes with a percentile X/A divergence ratio greater than 1.015 in adult males.**

| ID         | Term                          | #  | Sig. | Exp. | $P$ -value           | $P_{adj}$ -value |
|------------|-------------------------------|----|------|------|----------------------|------------------|
| GO:0007538 | primary sex determination     | 11 | 5    | 0.6  | $8.9 \times 10^{-5}$ | 0.312            |
| GO:0019748 | secondary metabolic process   | 24 | 7    | 1.32 | $1.6 \times 10^{-4}$ | 0.312            |
| GO:0030534 | adult behavior                | 34 | 7    | 1.86 | $6.2 \times 10^{-4}$ | 0.625            |
| GO:0007362 | terminal region determination | 10 | 3    | 0.5  | 0.0062               | 0.625            |
| GO:0046152 | ommochrome metabolic process  | 13 | 4    | 0.71 | 0.0076               | 1.0              |

Enrichment is based on the ‘parent-child’ algorithm in the topGO R package and Fisher’s exact test applied to 352 genes that have an X/A percentile divergence ratio of  $> 1.015$  against the background of the genes in the dataset. # - total number of genes with this annotation in the dataset. Sig. - significant, Exp. - expected.  $P_{adj}$ -value - adjusted according to the Benjamini-Hochberg false discovery rate.
