# Supplementary material for: An Excess of Gene Expression Divergence on the X Chromosome in Drosophila Embryos: Implications for the Faster-X Hypothesis
Source: PubMed Central journal article supplement (PMC3531489; doi:10.1371/journal.pgen.1003200), 2012-12-27
Supplement: pgen.1003200.s037.pdf [file pgen.1003200.s037.pdf]

Supplementary Table 11: **Characterisation of the embryonic expression patterns of genes residing on the X chromosome in *Drosophila*.**

| Test  | ID  | Term                     | #    | Sig. | Exp.   | $P$ -value           | $P_{adj}$ -value     |
|-------|-----|--------------------------|------|------|--------|----------------------|----------------------|
| Under | 254 | cellular blastoderm      | 3039 | 418  | 477.37 | $2.6 \times 10^{-7}$ | $9.5 \times 10^{-5}$ |
|       | 273 | visual anlage            | 100  | 7    | 15.71  | 0.017                | 1.0                  |
|       | 222 | visual primordium        | 88   | 6    | 13.82  | 0.022                | 1.0                  |
| Over  | 493 | no staining (stage 5)    | 2773 | 471  | 435.58 | 0.00029              | 0.10643              |
|       | 346 | muscle system primordium | 670  | 109  | 105.24 | 0.00392              | 0.71392              |
|       | 580 | apically cleared         | 74   | 19   | 11.62  | 0.01309              | 1.0                  |

Enrichment is based on the ‘parent-child’ algorithm in the topGO R package and Fisher’s exact test applied to 2228 genes that reside on the X chromosome in *Drosophila*, and enrichment is relative to the whole genome. Terms with uncorrected  $P$ -values below 0.05 are shown. # - total number of genes with this annotation in the dataset. Sig. - significant, Exp. - expected.  $P_{adj}$ -value - adjusted according to the Benjamini-Hochberg false discovery rate.
