# Supplementary material for: An Excess of Gene Expression Divergence on the X Chromosome in Drosophila Embryos: Implications for the Faster-X Hypothesis
Source: PubMed Central journal article supplement (PMC3531489; doi:10.1371/journal.pgen.1003200), 2012-12-27
Supplement: pgen.1003200.s038.pdf [file pgen.1003200.s038.pdf]

Supplementary Table 12: Fitnesses in a diploid two-locus epistatic model with X-linkage.

|                  |    | $\sigma^{\circ}$   |                    |                    |                    |         |
|------------------|----|--------------------|--------------------|--------------------|--------------------|---------|
|                  |    | TC                 | Tc                 | tC                 | tc                 | 00      |
| $\sigma^{\circ}$ | TC | 1                  | 1                  | 1                  | $1 + \frac{h}{2}s$ | 1       |
|                  | Tc | 1                  | 1                  | $1 + \frac{h}{2}s$ | $1 + hs$           | 1       |
|                  | tC | 1                  | $1 + \frac{h}{2}s$ | 1                  | $1 + hs$           | 1       |
|                  | tc | $1 + \frac{h}{2}s$ | $1 + hs$           | $1 + hs$           | $1 + s$            | $1 + s$ |

Fitnesses of different male-female gametic combinations when both the loci are located on the X chromosome. T/t - trans-acting gene; C/c - cis-acting locus; 00 - indicates a male gamete carrying a Y chromosome;  $s$  - selection coefficient;  $h$  - dominance coefficient.
