# Supplementary material for: An Excess of Gene Expression Divergence on the X Chromosome in Drosophila Embryos: Implications for the Faster-X Hypothesis
Source: PubMed Central journal article supplement (PMC3531489; doi:10.1371/journal.pgen.1003200), 2012-12-27
Supplement: pgen.1003200.s039.pdf [file pgen.1003200.s039.pdf]

Supplementary Table 13: Fitnesses in a diploid two-locus epistatic model.

|            |    | $\sigma^{\circ}$   |                    |                    |                    |          |          |
|------------|----|--------------------|--------------------|--------------------|--------------------|----------|----------|
|            |    | TC                 | Tc                 | tC                 | tc                 | T0       | t0       |
| $\text{♀}$ | TC | 1                  | 1                  | 1                  | $1 + \frac{h}{2}s$ | 1        | 1        |
|            | Tc | 1                  | 1                  | $1 + \frac{h}{2}s$ | $1 + hs$           | 1        | $1 + hs$ |
|            | tC | 1                  | $1 + \frac{h}{2}s$ | 1                  | $1 + hs$           | 1        | 1        |
|            | tc | $1 + \frac{h}{2}s$ | $1 + hs$           | $1 + hs$           | $1 + s$            | $1 + hs$ | $1 + s$  |

Fitnesses of different male-female gametic combinations when there is a beneficial partially recessive interaction between an autosomal allele and an X-linked allele (males are the heterogametic sex). T/t - trans-acting autosomal gene; C/c - cis-acting X-linked locus; 0 - indicates a male gamete carrying a Y chromosome;  $s$  - selection coefficient;  $h$  - dominance coefficient.
