# Supplementary material for: An Excess of Gene Expression Divergence on the X Chromosome in Drosophila Embryos: Implications for the Faster-X Hypothesis
Source: PLoS Genet. 2012 Dec 27;8(12):e1003200. doi: 10.1371/journal.pgen.1003200 (PMC3531489; doi:10.1371/journal.pgen.1003200)
Supplement: Table S2 — Contrasts for Drosophila embryo species comparisons. Aut - all autosomes. W - Wilcoxon rank sum test statistic. P-values adjusted according to Benjamini-Hochberg correction. (PDF) [file pgen.1003200.s028.pdf]

Supplementary Table 2: **Contrasts for *Drosophila* embryo species comparisons**

| Contrast | Mean 1st | Mean 2nd | W-stat   | <i>P</i> -value       | <i>P<sub>adj</sub></i> -value |
|----------|----------|----------|----------|-----------------------|-------------------------------|
| Aut-X    | 1.912150 | 2.312695 | 331955.5 | $2.19 \times 10^{-7}$ | -                             |
| 2L-X     | 1.906623 | 2.312695 | 74430    | $3.8 \times 10^{-6}$  | $1.9 \times 10^{-5}$          |
| 2R-X     | 1.808078 | 2.312695 | 79352    | $8.8 \times 10^{-9}$  | $8.8 \times 10^{-8}$          |
| 3L-X     | 1.951095 | 2.312695 | 89006    | $1.8 \times 10^{-5}$  | $4.7 \times 10^{-5}$          |
| 3R-X     | 1.963467 | 2.312695 | 104232.5 | $6.3 \times 10^{-6}$  | $2.1 \times 10^{-5}$          |
| 2L-2R    | 1.906623 | 1.808078 | 196983.5 | 0.171                 | 0.244                         |
| 2L-3L    | 1.906623 | 1.951095 | 193720   | 0.723                 | 0.803                         |
| 2L-3R    | 1.906623 | 1.963467 | 227856   | 0.664                 | 0.803                         |
| 2R-3L    | 1.808078 | 1.951095 | 208468   | 0.089                 | 0.148                         |
| 2R-3R    | 1.808078 | 1.963467 | 244404   | 0.053                 | 0.106                         |
| 3L-3R    | 1.951095 | 1.963467 | 269368   | 0.926                 | 0.926                         |

Aut - all autosomes. W - Wilcoxon rank sum test statistic. P-values adjusted according to Benjamini-Hochberg correction.
